# Supplementary material for: Two isomeric In(iii)-MOFs: unexpected stability difference and selective fluorescence detection of fluoroquinolone antibiotics in water
Source: Royal Society of Chemistry journal article supplement (doi:10.1039/c9qi01490j), 2020-01-01
Supplement: c9qi01490j1.pdf [file c9qi01490j1.pdf]

## *Supplementary information*

### **Two isomeric In(III)-MOFs: Unexpected stability difference and selective fluorescence detection of fluoroquinolone antibiotics in water**

Wen-Bin Zhong, Ru-Xia Li, Jie Lv, Tao He, Ming-Ming Xu, Bin Wang, Lin-Hua

Xie\* and Jian-Rong Li\*

Beijing Key Laboratory for Green Catalysis and Separation and Department of Chemistry and Chemical Engineering, College of Environmental and Energy Engineering, Beijing University of Technology, Beijing 100124, P. R. China.

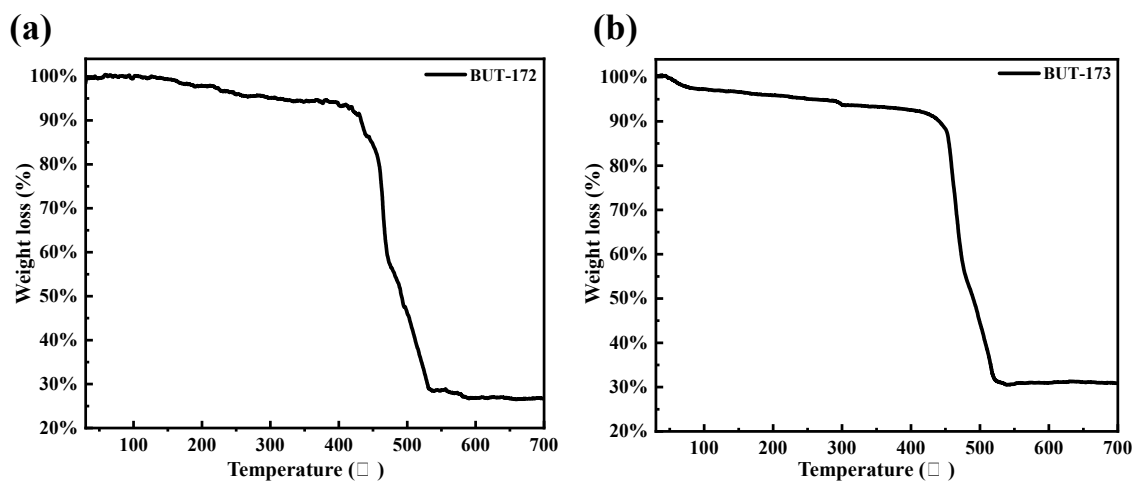

**Fig. S1.** TGA curves of BUT-172 (a) and BUT-173 (b).

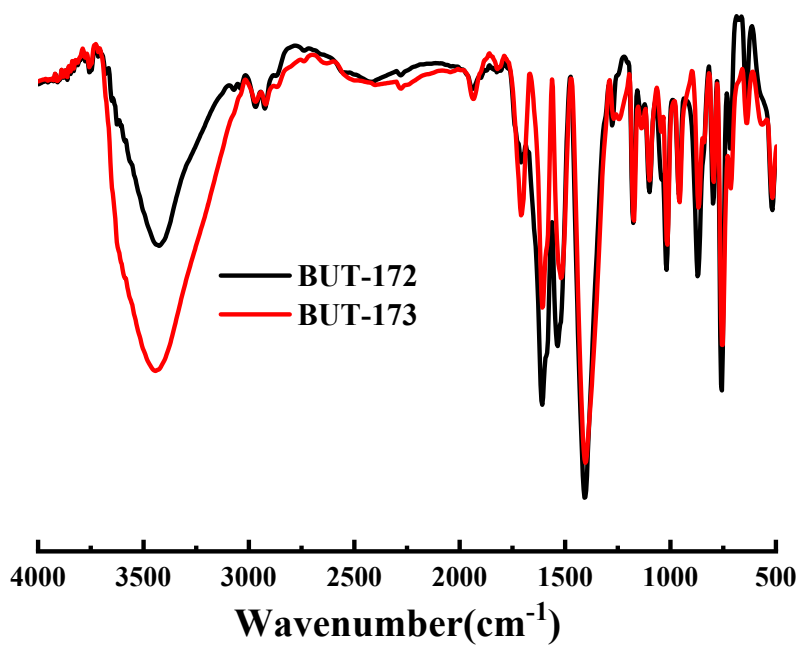

**Fig. S2.** FT-IR spectra of BUT-172 and BUT-173.

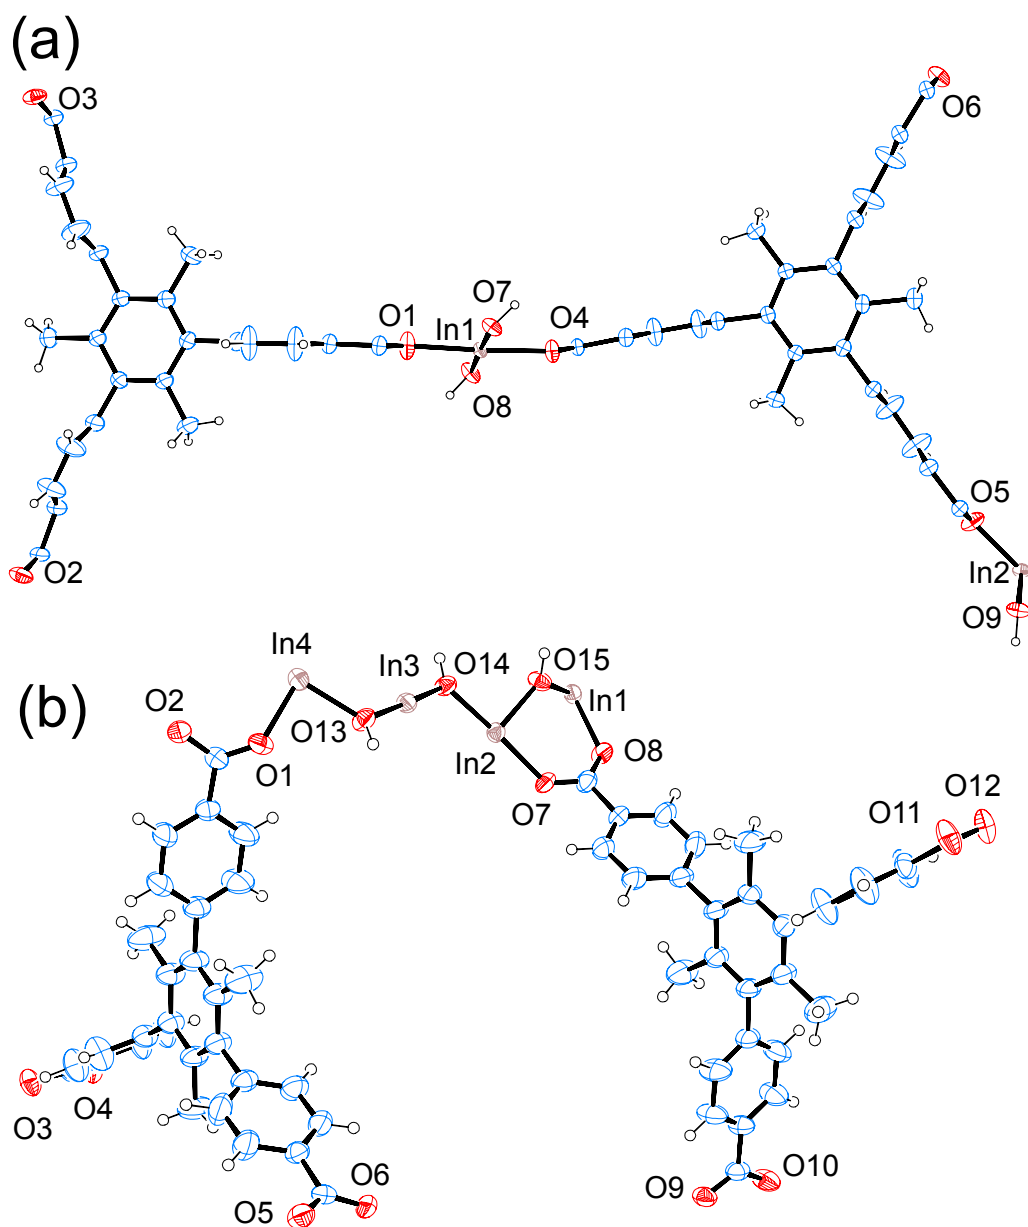

**Fig. S3** An ORTEP view of the asymmetric units of **BUT-172** (a) and **BUT-173** (b). Displacement ellipsoids are represented by 50% probability level.

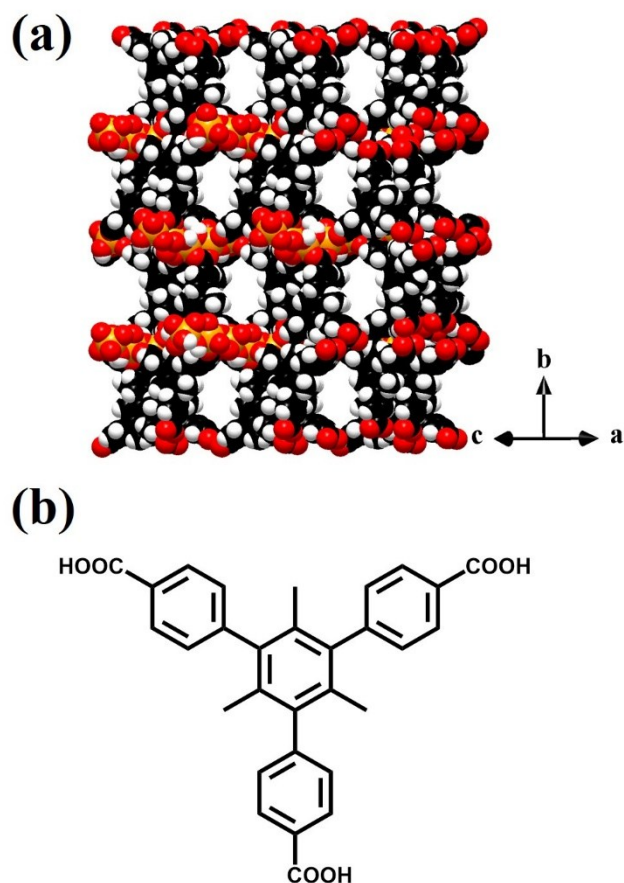

**Fig. S4** (a)The channels in **BUT-173** viewing along the [101] direction, (b) the molecular structure of the  $H_3CTTA$  ligand.

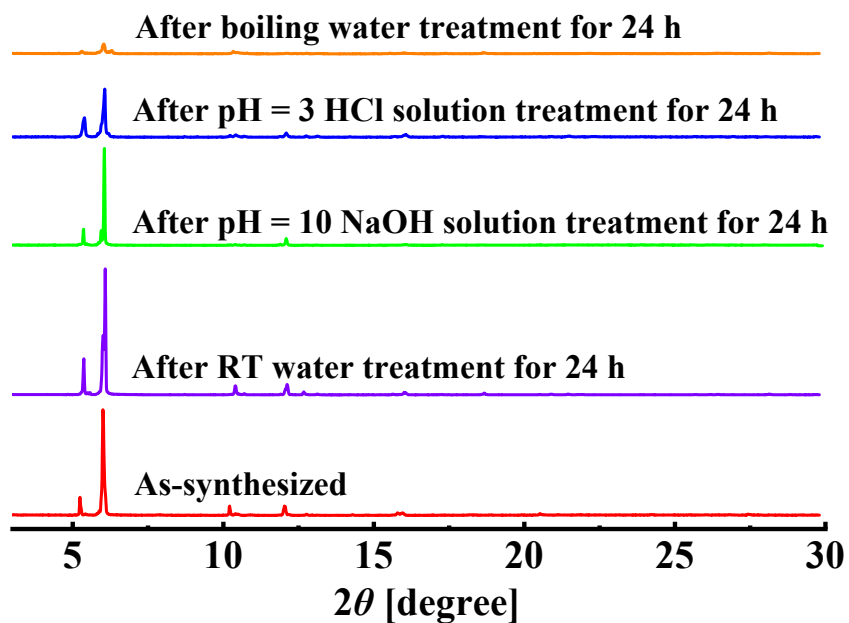

**Fig. S5** PXRD patterns of **BUT-173** before and after stability tests, and PXRD patterns were not normalized to compare their crystallinities.

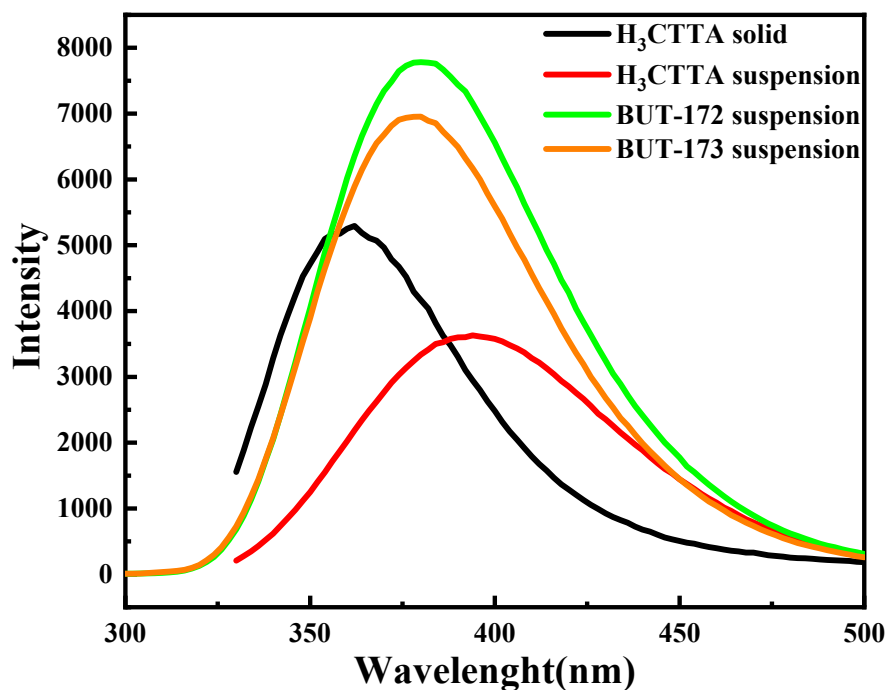

**Fig. S6.** Luminescent spectra of H<sub>3</sub>CTTA (solid, suspension in water), BUT-172 and BUT-173 (suspension in water)

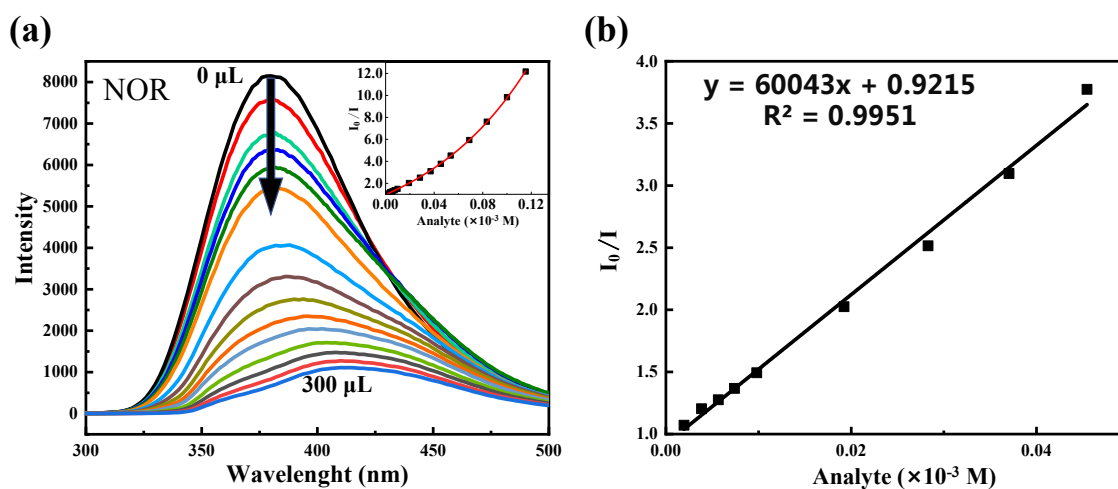

**Fig. S7** (a) Effect on the emission spectra of BUT-172 dispersed in water upon the incremental addition of 300 μL (500 μM) water solution of NOR, (b) Stern-Volmer plot of NOR.

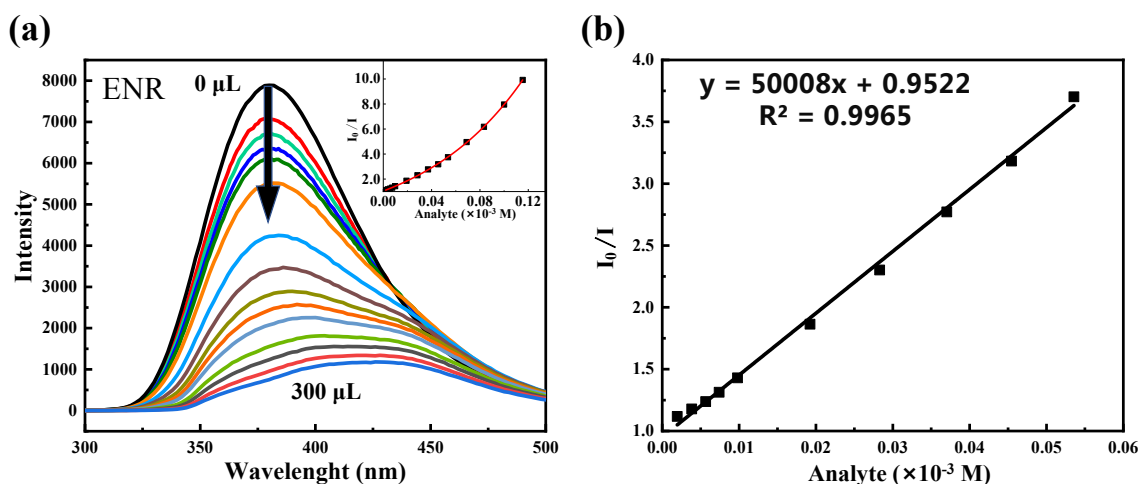

**Fig. S8** (a) Effect on the emission spectra of BUT-172 dispersed in water upon the incremental addition of 300  $\mu\text{L}$  (500  $\mu\text{M}$ ) water solution of ENR, (b) Stern-Volmer plot of ENR.

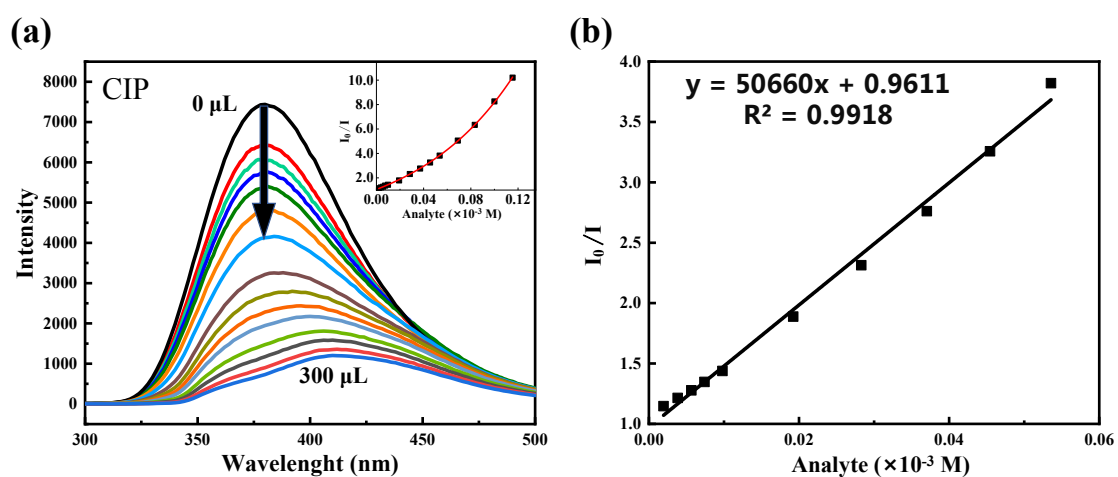

**Fig. S9** (a) Effect on the emission spectra of BUT-172 dispersed in water upon the incremental addition of 300  $\mu\text{L}$  (500  $\mu\text{M}$ ) water solution of CIP, (b) Stern-Volmer plot of CIP.

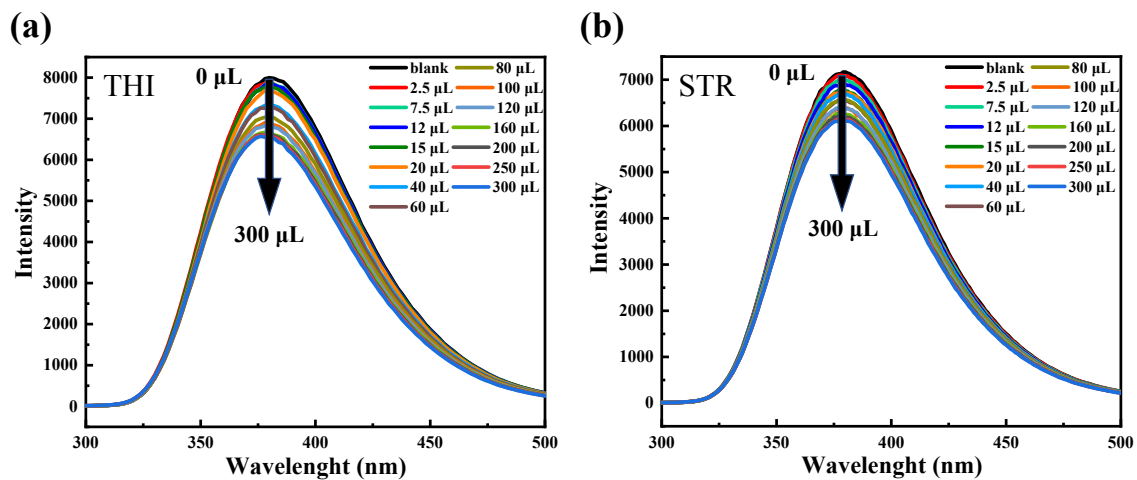

**Fig. S10** Effect on the emission spectra of **BUT-172** dispersed in water upon the incremental addition of 300  $\mu\text{L}$  (500  $\mu\text{M}$ ) water solution of (a) THI, (b) STR.

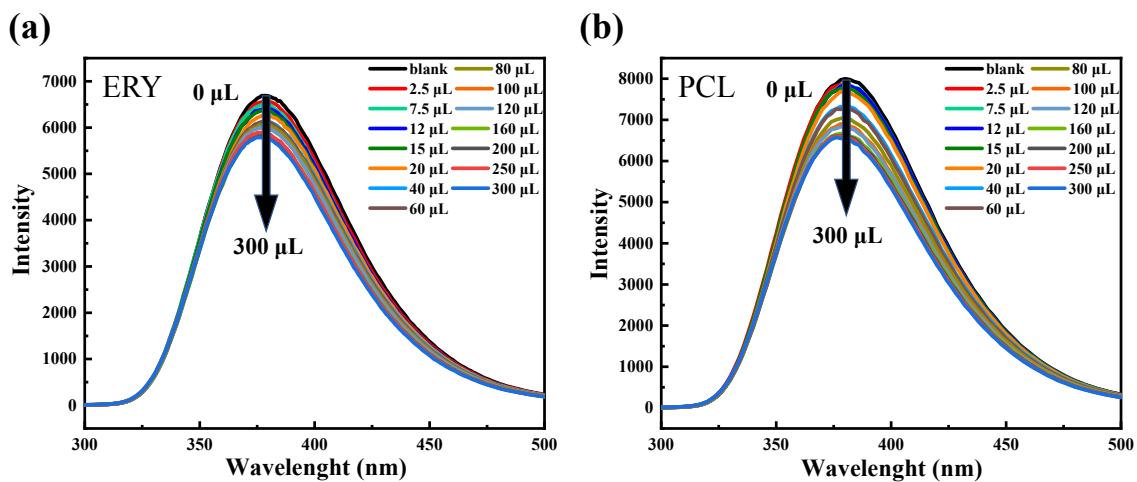

**Fig. S11** Effect on the emission spectra of **BUT-172** dispersed in water upon the incremental addition of 300  $\mu\text{L}$  (500  $\mu\text{M}$ ) water solution of (a) ERY, (b) PCL.

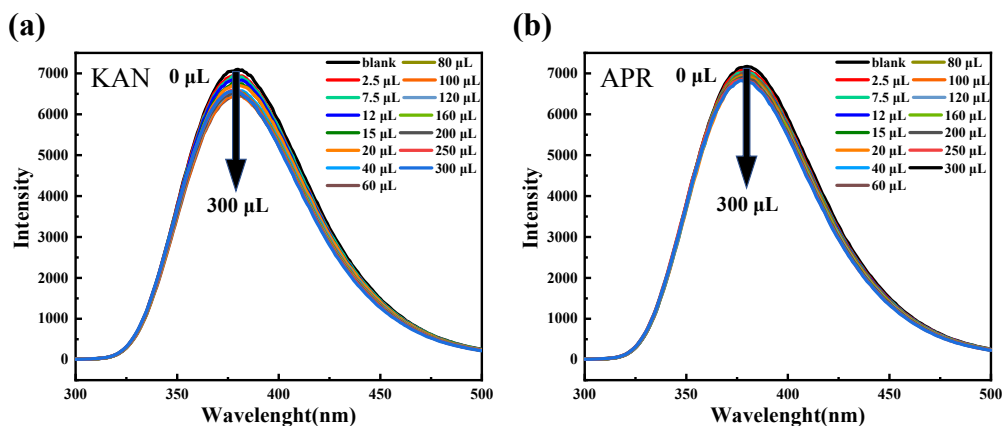

**Fig. S12** Effect on the emission spectra of **BUT-172** dispersed in water upon the incremental addition of 300  $\mu\text{L}$  (500  $\mu\text{M}$ ) water solution of (a) KAN, (b) APR.

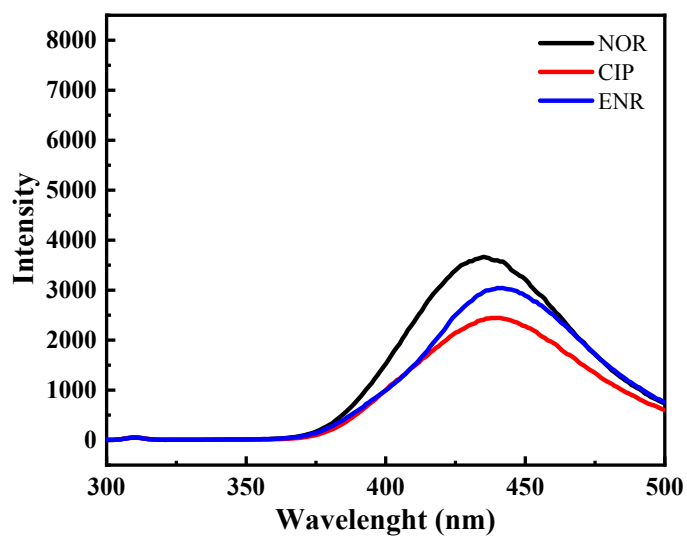

**Fig. S13** The emission spectra of NOR, CIP, ENR (0.11mM) dissolved in water (excitation wavelength 280nm).



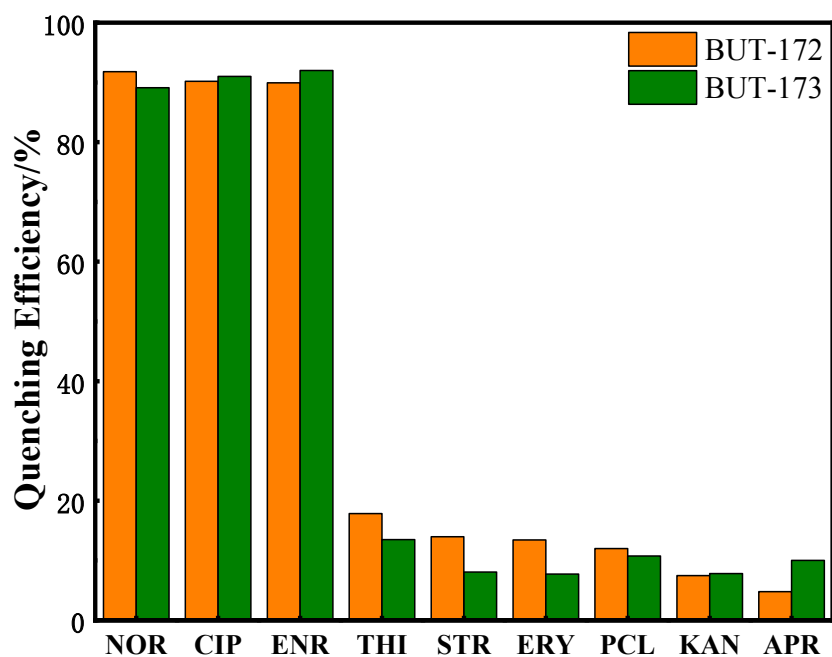

**Fig. S14** Fluorescence quenching efficiencies of **BUT-172** and **BUT-173** by the antibiotics at room temperature.

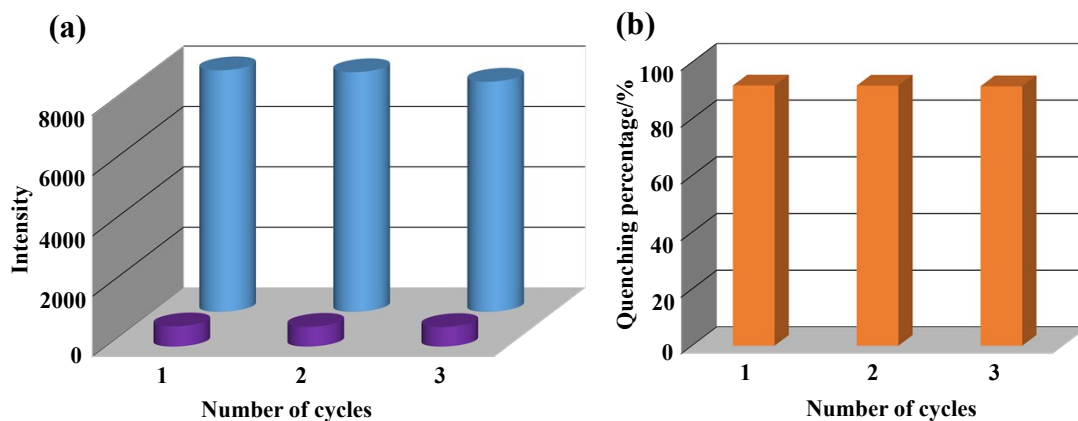

**Fig. S15** (a) The initial fluorescence intensities (blue bars) of the **BUT-172** suspensions and those after the addition of 300 μL NOR (0.5 mM) aqueous solution (purple bars) in each regeneration test. (b) The quenching efficiencies of the **BUT-172** suspensions by the addition of 300 μL NOR (0.5 mM) aqueous solution for each regeneration test.

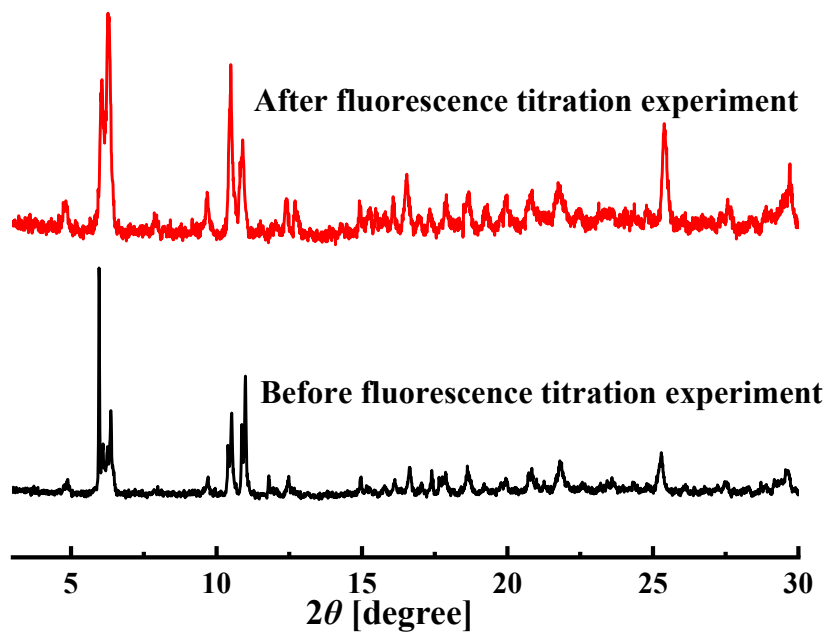

**Fig. S16** The PXR D patterns of BUT-172 before and after the fluorescence titration experiment.

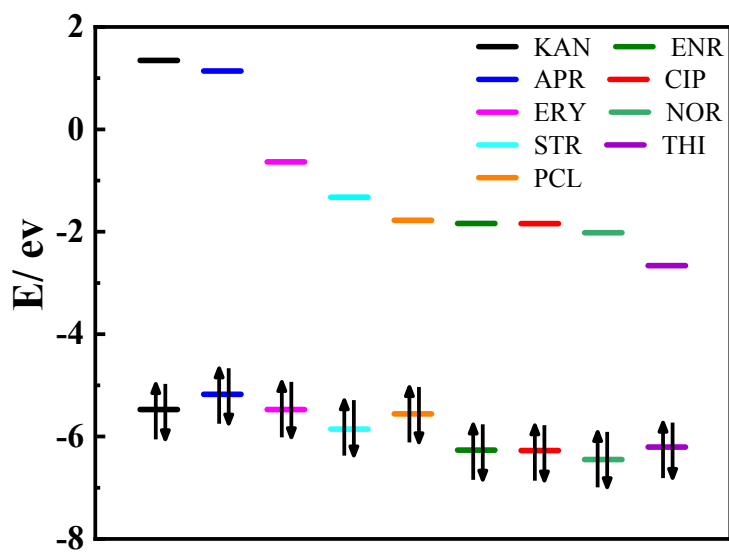

**Fig. S17** HOMO and LUMO energies for selected antibiotics arranged in descending order of LUMO energies.

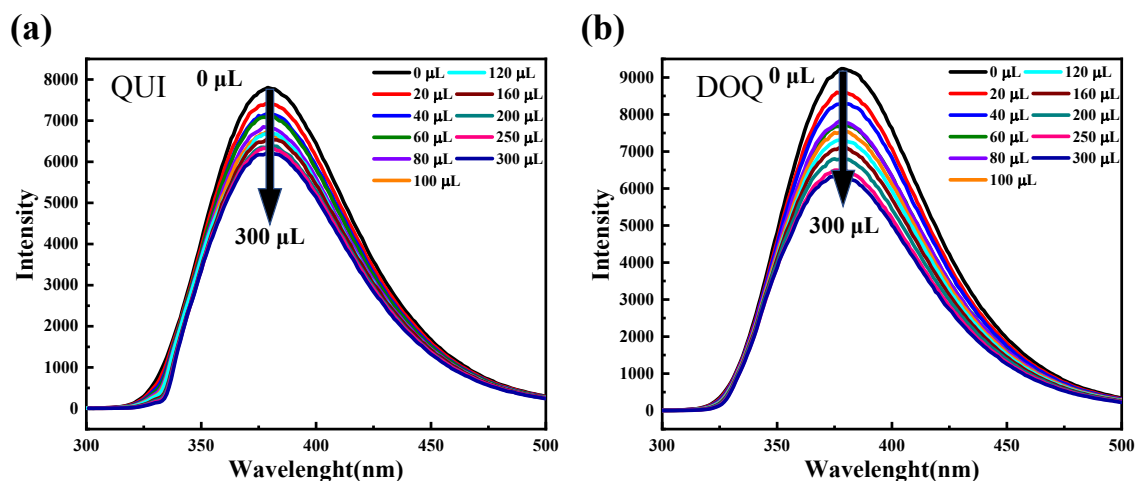

**Fig. S18** The change of the fluorescence of aqueous **BUT-172** suspensions upon the incremental addition of 300 μL aqueous solution of (a) QUI, or (b) DOQ (500 μM).

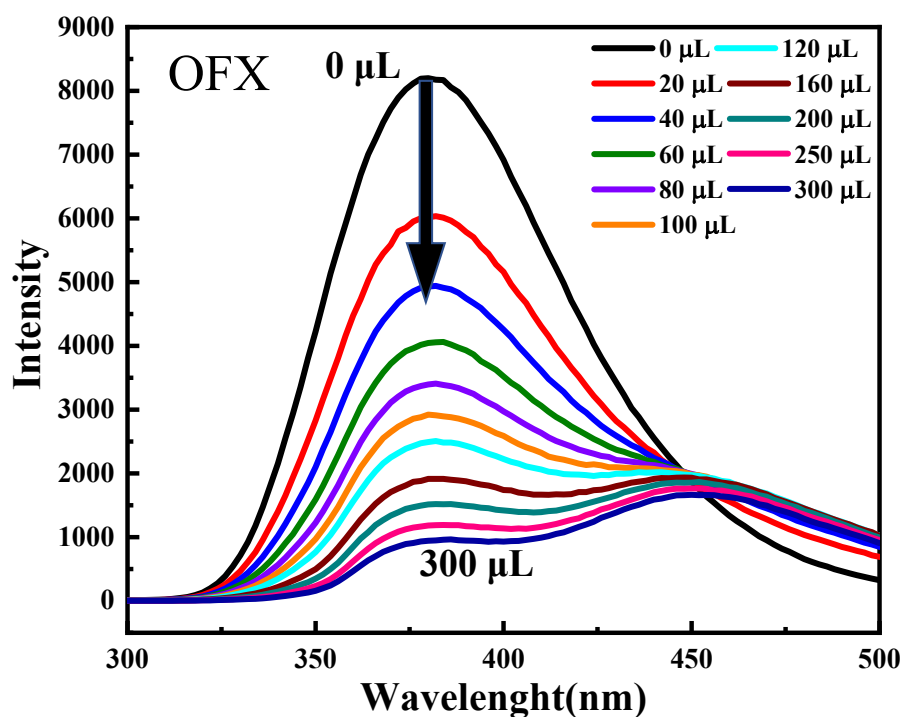

**Fig. S19** The change of the fluorescence of an aqueous **BUT-172** suspension upon the incremental addition of 300 μL aqueous solution of OFX (500 μM).

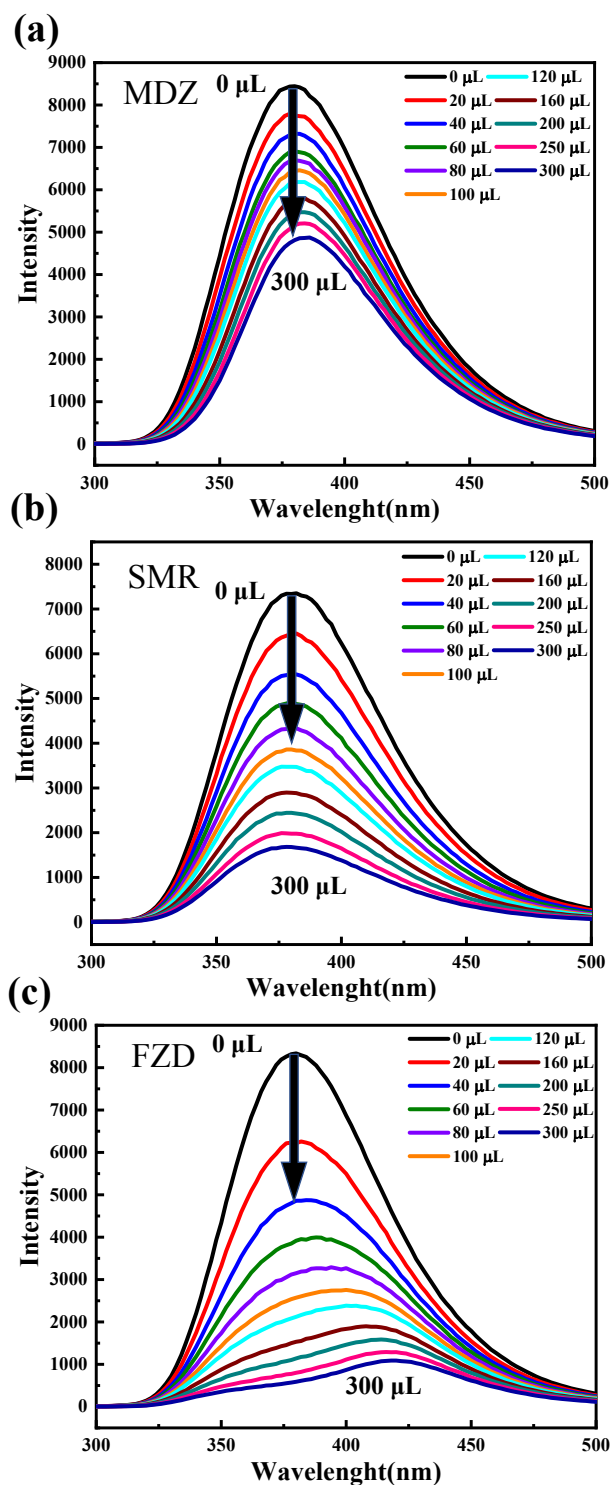

**Fig. S20** The change of the fluorescence of aqueous **BUT-172** suspensions upon the incremental addition of 300  $\mu\text{L}$  aqueous solution of (a) MDZ, (b) SMR, and (c) FZD (500  $\mu\text{M}$ ).

Table S1. HOMO and LUMO energies calculated for selected analytes used at B3LYP/6-31G\*level.

| Analytes | HOMO (ev) | LUMO (ev) | Band Gap (ev) |
|----------|-----------|-----------|---------------|
| KAN      | -5.473    | 1.345     | 6.818         |
| APR      | -5.176    | 1.139     | 6.315         |
| ERY      | -5.472    | -0.636    | 4.836         |
| STR      | -5.854    | -1.325    | 4.529         |
| PCL      | -5.558    | -1.777    | 3.781         |
| ENR      | -6.264    | -1.837    | 4.427         |
| CIP      | -6.274    | -1.841    | 4.433         |
| NOR      | -6.450    | -2.020    | 4.430         |
| THI      | -6.206    | -2.661    | 3.545         |

Table S2. Crystal data and structure refinement for **BUT-172** and **BUT-173**.

|                                                                                                       | <b>BUT-172</b>                                                     | <b>BUT-173</b>                                                     |
|-------------------------------------------------------------------------------------------------------|--------------------------------------------------------------------|--------------------------------------------------------------------|
| Empirical formula                                                                                     | C <sub>60</sub> H <sub>45</sub> In <sub>3</sub> O <sub>15</sub>    | C <sub>60</sub> H <sub>45</sub> In <sub>3</sub> O <sub>15</sub>    |
| Formula weight                                                                                        | 1350.42                                                            | 1350.42                                                            |
| Measurement temperature                                                                               | 293(2) K                                                           | 293(2) K                                                           |
| Crystal system                                                                                        | Orthorhombic                                                       | Monoclinic                                                         |
| Space group                                                                                           | <i>Pnma</i>                                                        | <i>P2<sub>1</sub>/n</i>                                            |
| <i>a</i> (Å)                                                                                          | 49.7021(5)                                                         | 18.9338(6)                                                         |
| <i>b</i> (Å)                                                                                          | 7.26820(10)                                                        | 29.1926(9)                                                         |
| <i>c</i> (Å)                                                                                          | 30.1678(4)                                                         | 20.8268(7)                                                         |
| $\alpha$ (°)                                                                                          | 90                                                                 | 90                                                                 |
| $\beta$ (°)                                                                                           | 90                                                                 | 113.720(4)                                                         |
| $\gamma$ (°)                                                                                          | 90                                                                 | 90                                                                 |
| Volume(Å <sup>3</sup> )                                                                               | 10898.0(2)                                                         | 10539.1(7)                                                         |
| Z                                                                                                     | 4                                                                  | 4                                                                  |
| Calculated density(g cm <sup>-3</sup> )                                                               | 0.823                                                              | 0.687                                                              |
| Absorption coefficient (mm <sup>-1</sup> )                                                            | 5.321                                                              | 1.847                                                              |
| Independent reflections ( <i>I</i> > 2σ( <i>I</i> ))                                                  | 11102 [ <i>R</i> (int) = 0.0317]                                   | 3860 [ <i>R</i> (int) = 0.2153]                                    |
| <i>F</i> (000)                                                                                        | 2688                                                               | 2688                                                               |
| Reflections collected                                                                                 | 34774                                                              | 64310                                                              |
| $\vartheta$ range for data collection                                                                 | 3.847-70.496°                                                      | 3.365-26.372°                                                      |
| Data/restraints/parameters                                                                            | 11102/0/412                                                        | 21510/0/706                                                        |
| Limiting indices                                                                                      | -53 ≤ <i>h</i> ≤ 60                                                | -23 ≤ <i>h</i> ≤ 18                                                |
|                                                                                                       | -33 ≤ <i>k</i> ≤ 27                                                | -34 ≤ <i>h</i> ≤ 36                                                |
|                                                                                                       | -33 ≤ <i>l</i> ≤ 33                                                | -16 ≤ <i>h</i> ≤ 26                                                |
| Goodness-of-fit on <i>F</i> <sup>2</sup>                                                              | 1.069                                                              | 1.034                                                              |
| <i>R</i> <sub>1</sub> <sup>a</sup> , <i>wR</i> <sub>2</sub> <sup>b</sup> [ <i>I</i> > 2σ( <i>I</i> )] | <i>R</i> <sub>1</sub> = 0.0475, <i>wR</i> <sub>2</sub> =<br>0.1314 | <i>R</i> <sub>1</sub> = 0.0491, <i>wR</i> <sub>2</sub> =<br>0.0968 |
| <i>R</i> <sub>1</sub> <sup>a</sup> , <i>wR</i> <sub>2</sub> <sup>b</sup> (all data)                   | <i>R</i> <sub>1</sub> = 0.0613, <i>wR</i> <sub>2</sub> =<br>0.1416 | <i>R</i> <sub>1</sub> = 0.0759, <i>wR</i> <sub>2</sub> =<br>0.1080 |
| Largest diff. peak and hole (e/Å <sup>3</sup> )                                                       | 0.988 and -1.070                                                   | 2.021 and -0.976                                                   |

<sup>a</sup>  $R_1 = \sum ||F_o| - |F_c|| / \sum |F_o|$ . <sup>b</sup>  $wR_2 = [\sum w(F_o^2 - F_c^2)^2 / \sum w(F_o^2)^2]^{1/2}$
